# Supplementary material
Source: publisher figshare collection journal article supplement (https://sage.figshare.com/ndownloader/files/16257278)
Supplement: Supplementary file 1 [file 16257278]

Supplemental Table 1

*Summary of Common Modifications Made to Sexual Perpetration Measures*

| Modification Type                                                                                   | <i>n</i> | % of modifications |
|-----------------------------------------------------------------------------------------------------|----------|--------------------|
| Changes to instructions, including response scale<br>(for example, putting the tactic clause first) | 21       | 25.9               |
| Added alcohol or substance use items                                                                | 16       | 19.8               |
| Added sexual outcome items (for example, gang<br>rape)                                              | 9        | 11.1               |
| Added verbal coercion items                                                                         | 9        | 11.1               |
| Dropped items                                                                                       | 7        | 8.2                |
| Added content, unclear what                                                                         | 6        | 7.4                |
| Added follow-up items regarding context of assault<br>(for example, relationship to perpetrator)    | 6        | 7.4                |
| Revised items to be gender-neutral                                                                  | 5        | 6.2                |
| Combined items                                                                                      | 2        | 2.4                |

Note. A total of 81 instances of modifications were documented
